# Supplementary material for: Deciphering the Reactive Pathways of Competitive Reactions inside Carbon Nanotubes
Source: MDPI journal article supplement (doi:10.3390/nano13010008), 2022-12-20
Supplement: s1 [file s1]

Article

# Deciphering the Reactive Pathways of Competitive Reactions inside Carbon Nanotubes

Tainah Dorina Marforio <sup>1,2</sup>, Michele Tomasini <sup>1</sup>, Andrea Bottoni <sup>1</sup>, Francesco Zerbetto <sup>1</sup>, Edoardo Jun Mattioli <sup>1,2,\*</sup> and Matteo Calvaresi <sup>1,2,\*</sup>

<sup>1</sup> Dipartimento di Chimica “Giacomo Ciamician”, Alma Mater Studiorum-Università di Bologna, Via Francesco Selmi 2, 40126 Bologna, Italy

<sup>2</sup> Center for Chemical Catalysis—C3, Alma Mater Studiorum—Università di Bologna, Via Selmi 2, 40126 Bologna, Italy

\* Correspondence: edoardojun.mattioli2@unibo.it (E.J.M.), matteo.calvaresi3@unibo.it (M.C.)

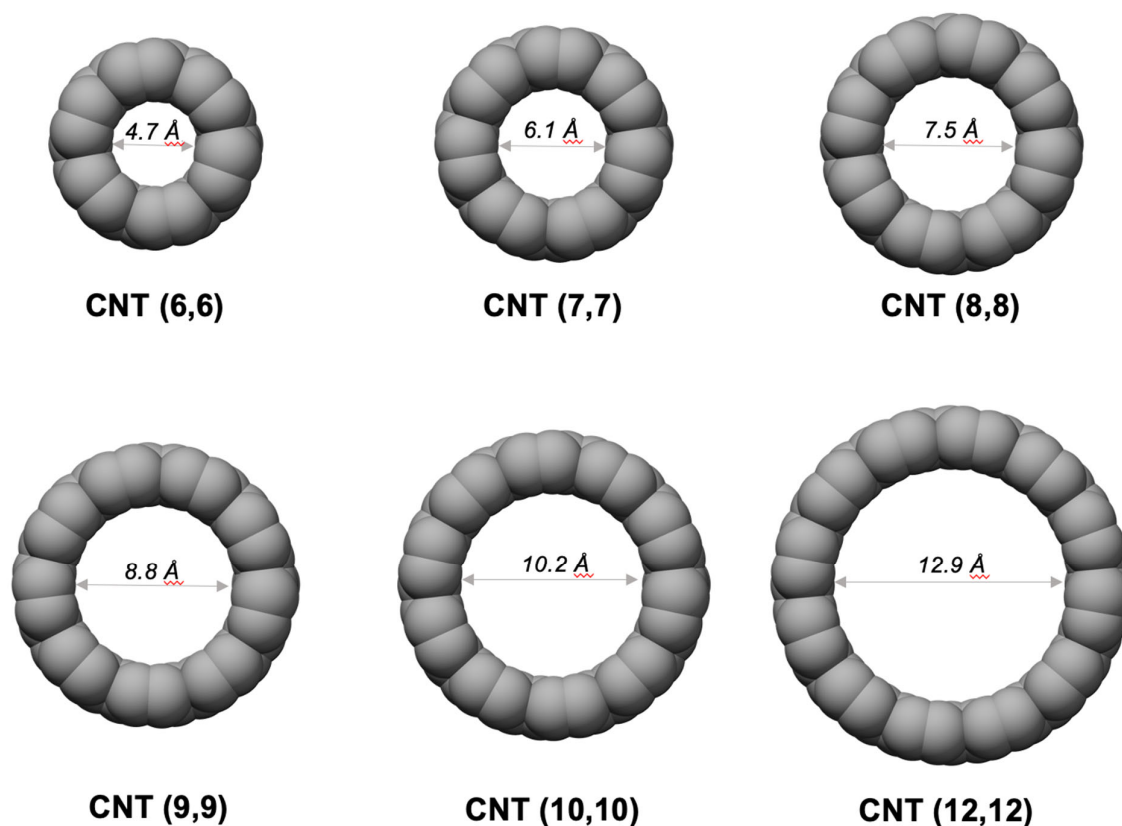

**Figure S1.** Accessible vdW diameters for CNT(6,6), CNT(7,7), CNT(8,8), CNT(9,9), CNT(10,10), CNT(12,12).
